# Supplementary material for: Evaluating the ecological and social targeting of a compensation scheme in Bangladesh
Source: PLOS journal article supplement (doi:10.1371/journal.pone.0197809), 2018-06-13
Supplement: S5 (10.1371/journal.pone.0197809.s005) [file journal.pone.0197809.s005]

(a)

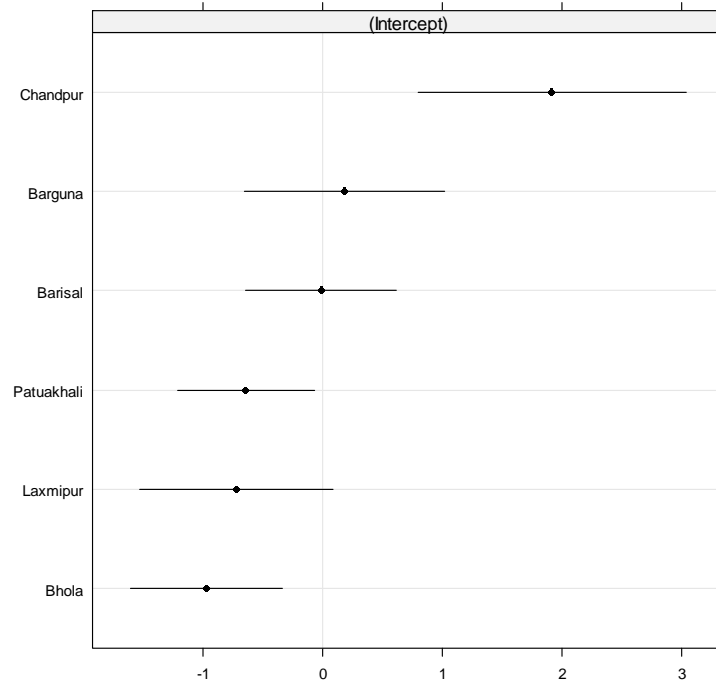

(b)

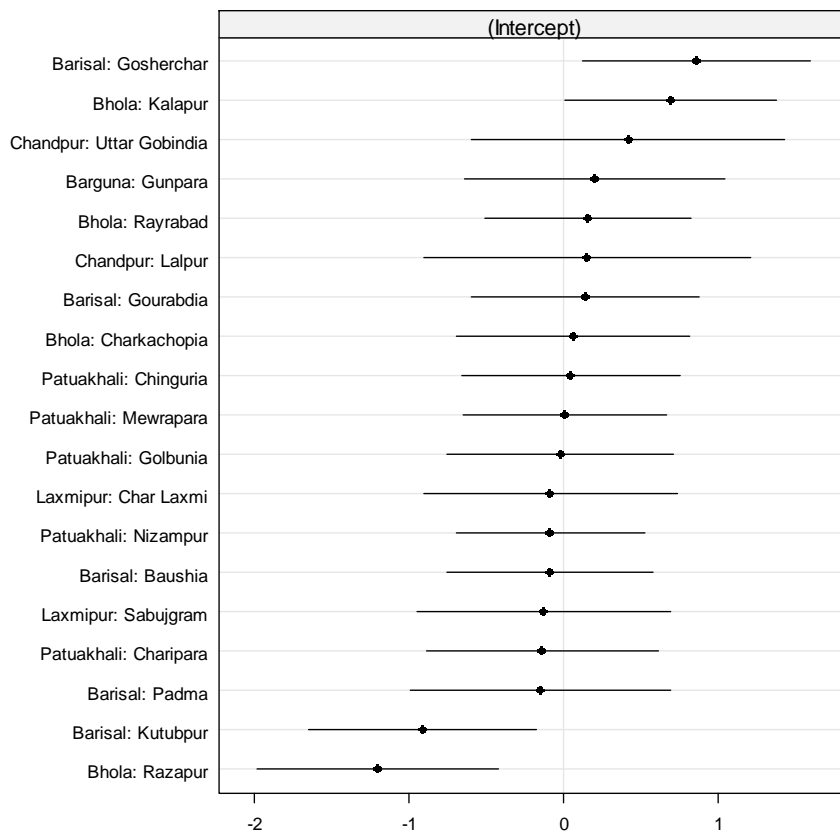

**S1 Fig. Best Linear Unbiased Predictors (BLUPs) for the random effects for the probability of receiving compensation.** The x axes show the effect of living in a particular district (a) or village (b) in terms of the difference in probability of receiving compensation from the intercept. Error bars show the 95% confidence interval based on the conditional variance for each random effect. Village names are prefixed by district.
